# Supplementary figures and images for: Comparative Study of Gut Microbiota in Wild and Captive Giant Pandas (Ailuropoda melanoleuca)
Source: MDPI journal article supplement (doi:10.3390/genes10100827), 2019-10-20

Figure.S2

**A**

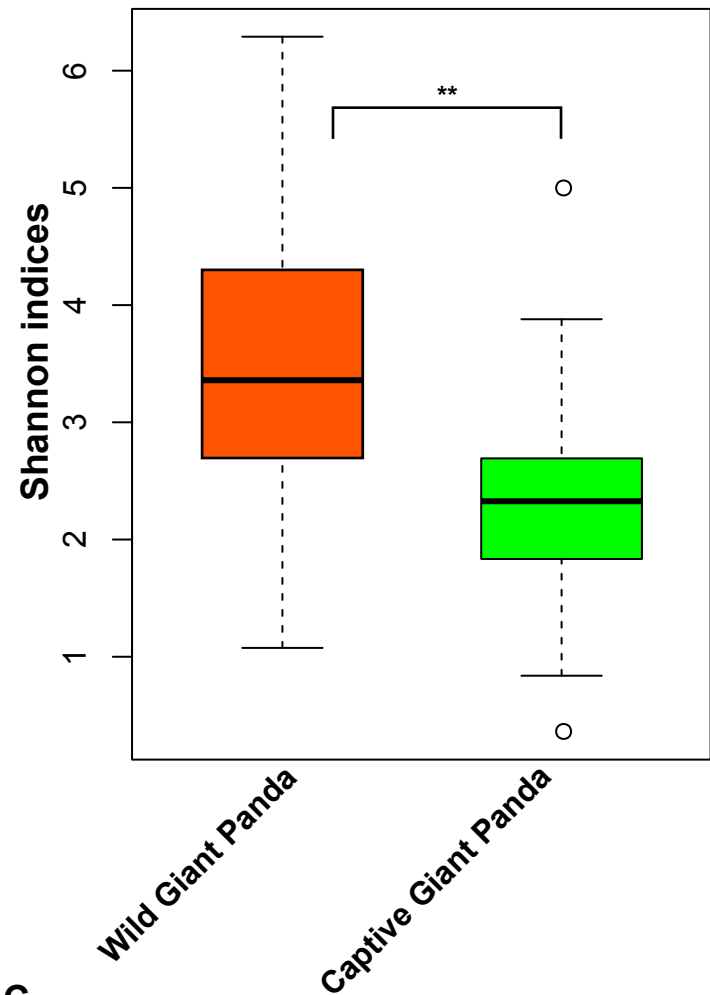

**B**

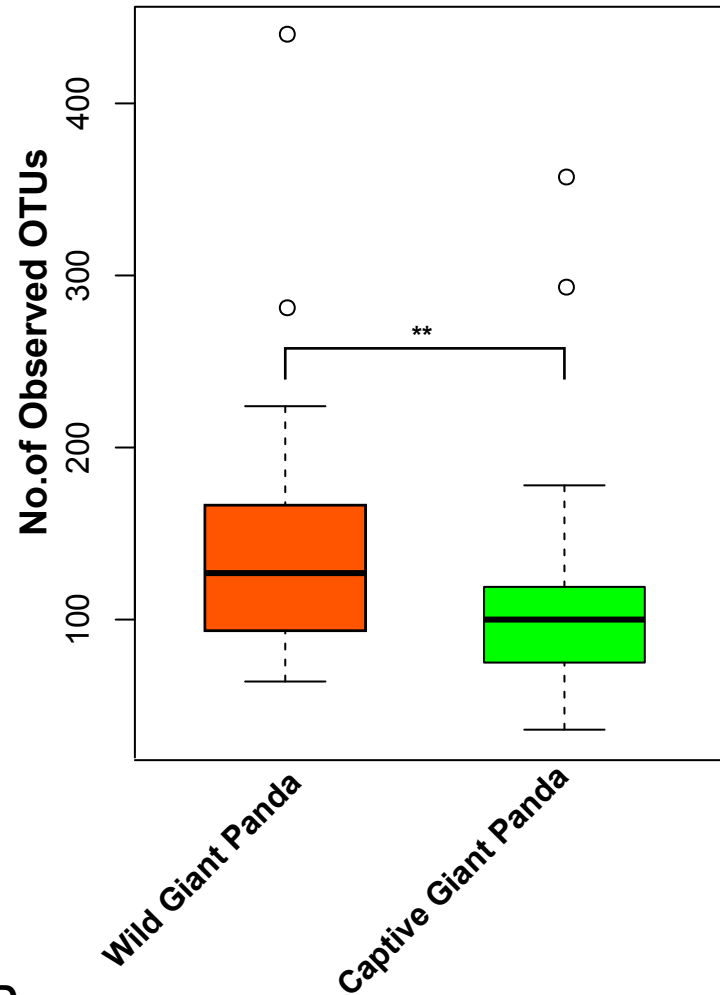

**C**

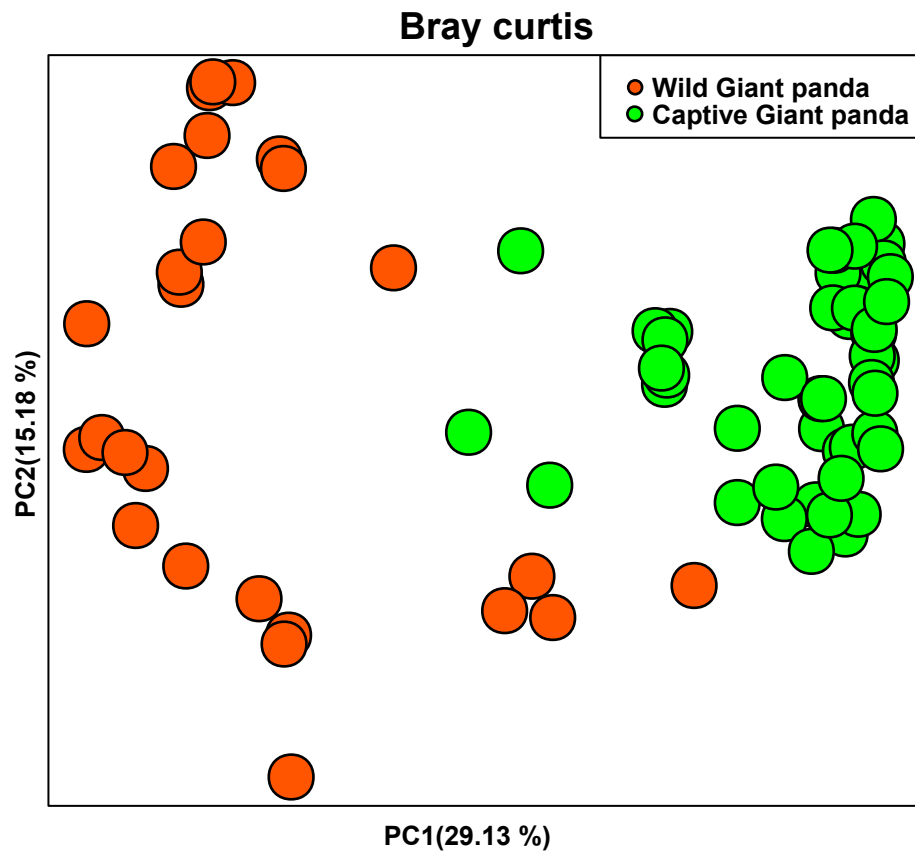

**D**

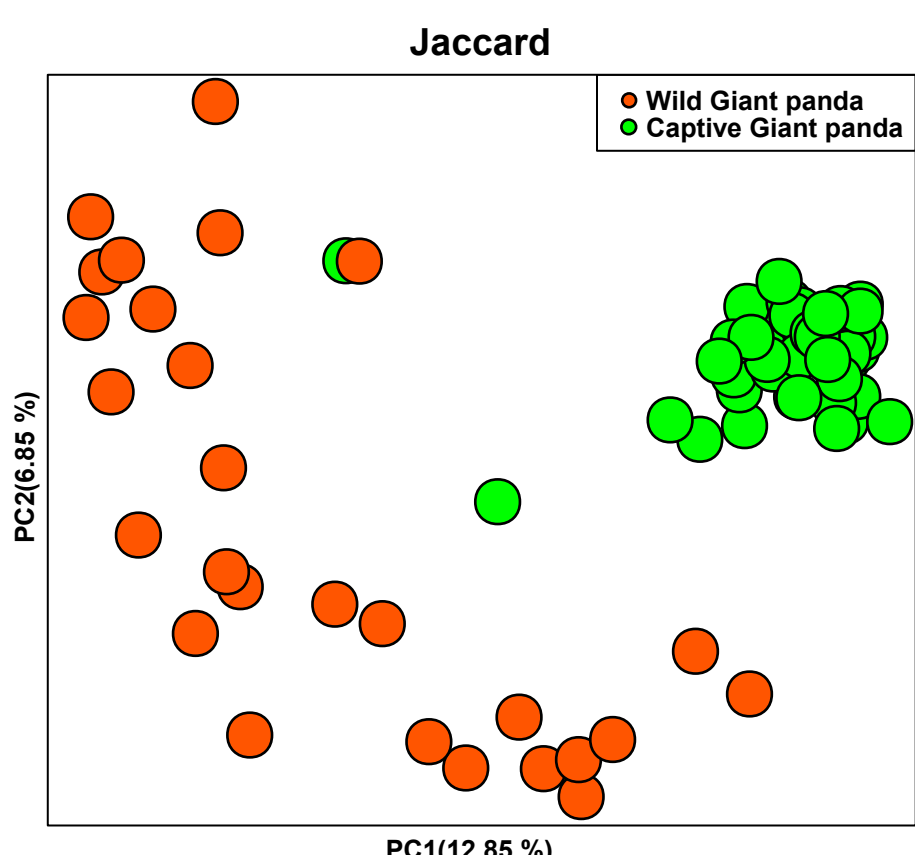

Supplement: s1 [file s1]

Figure S6

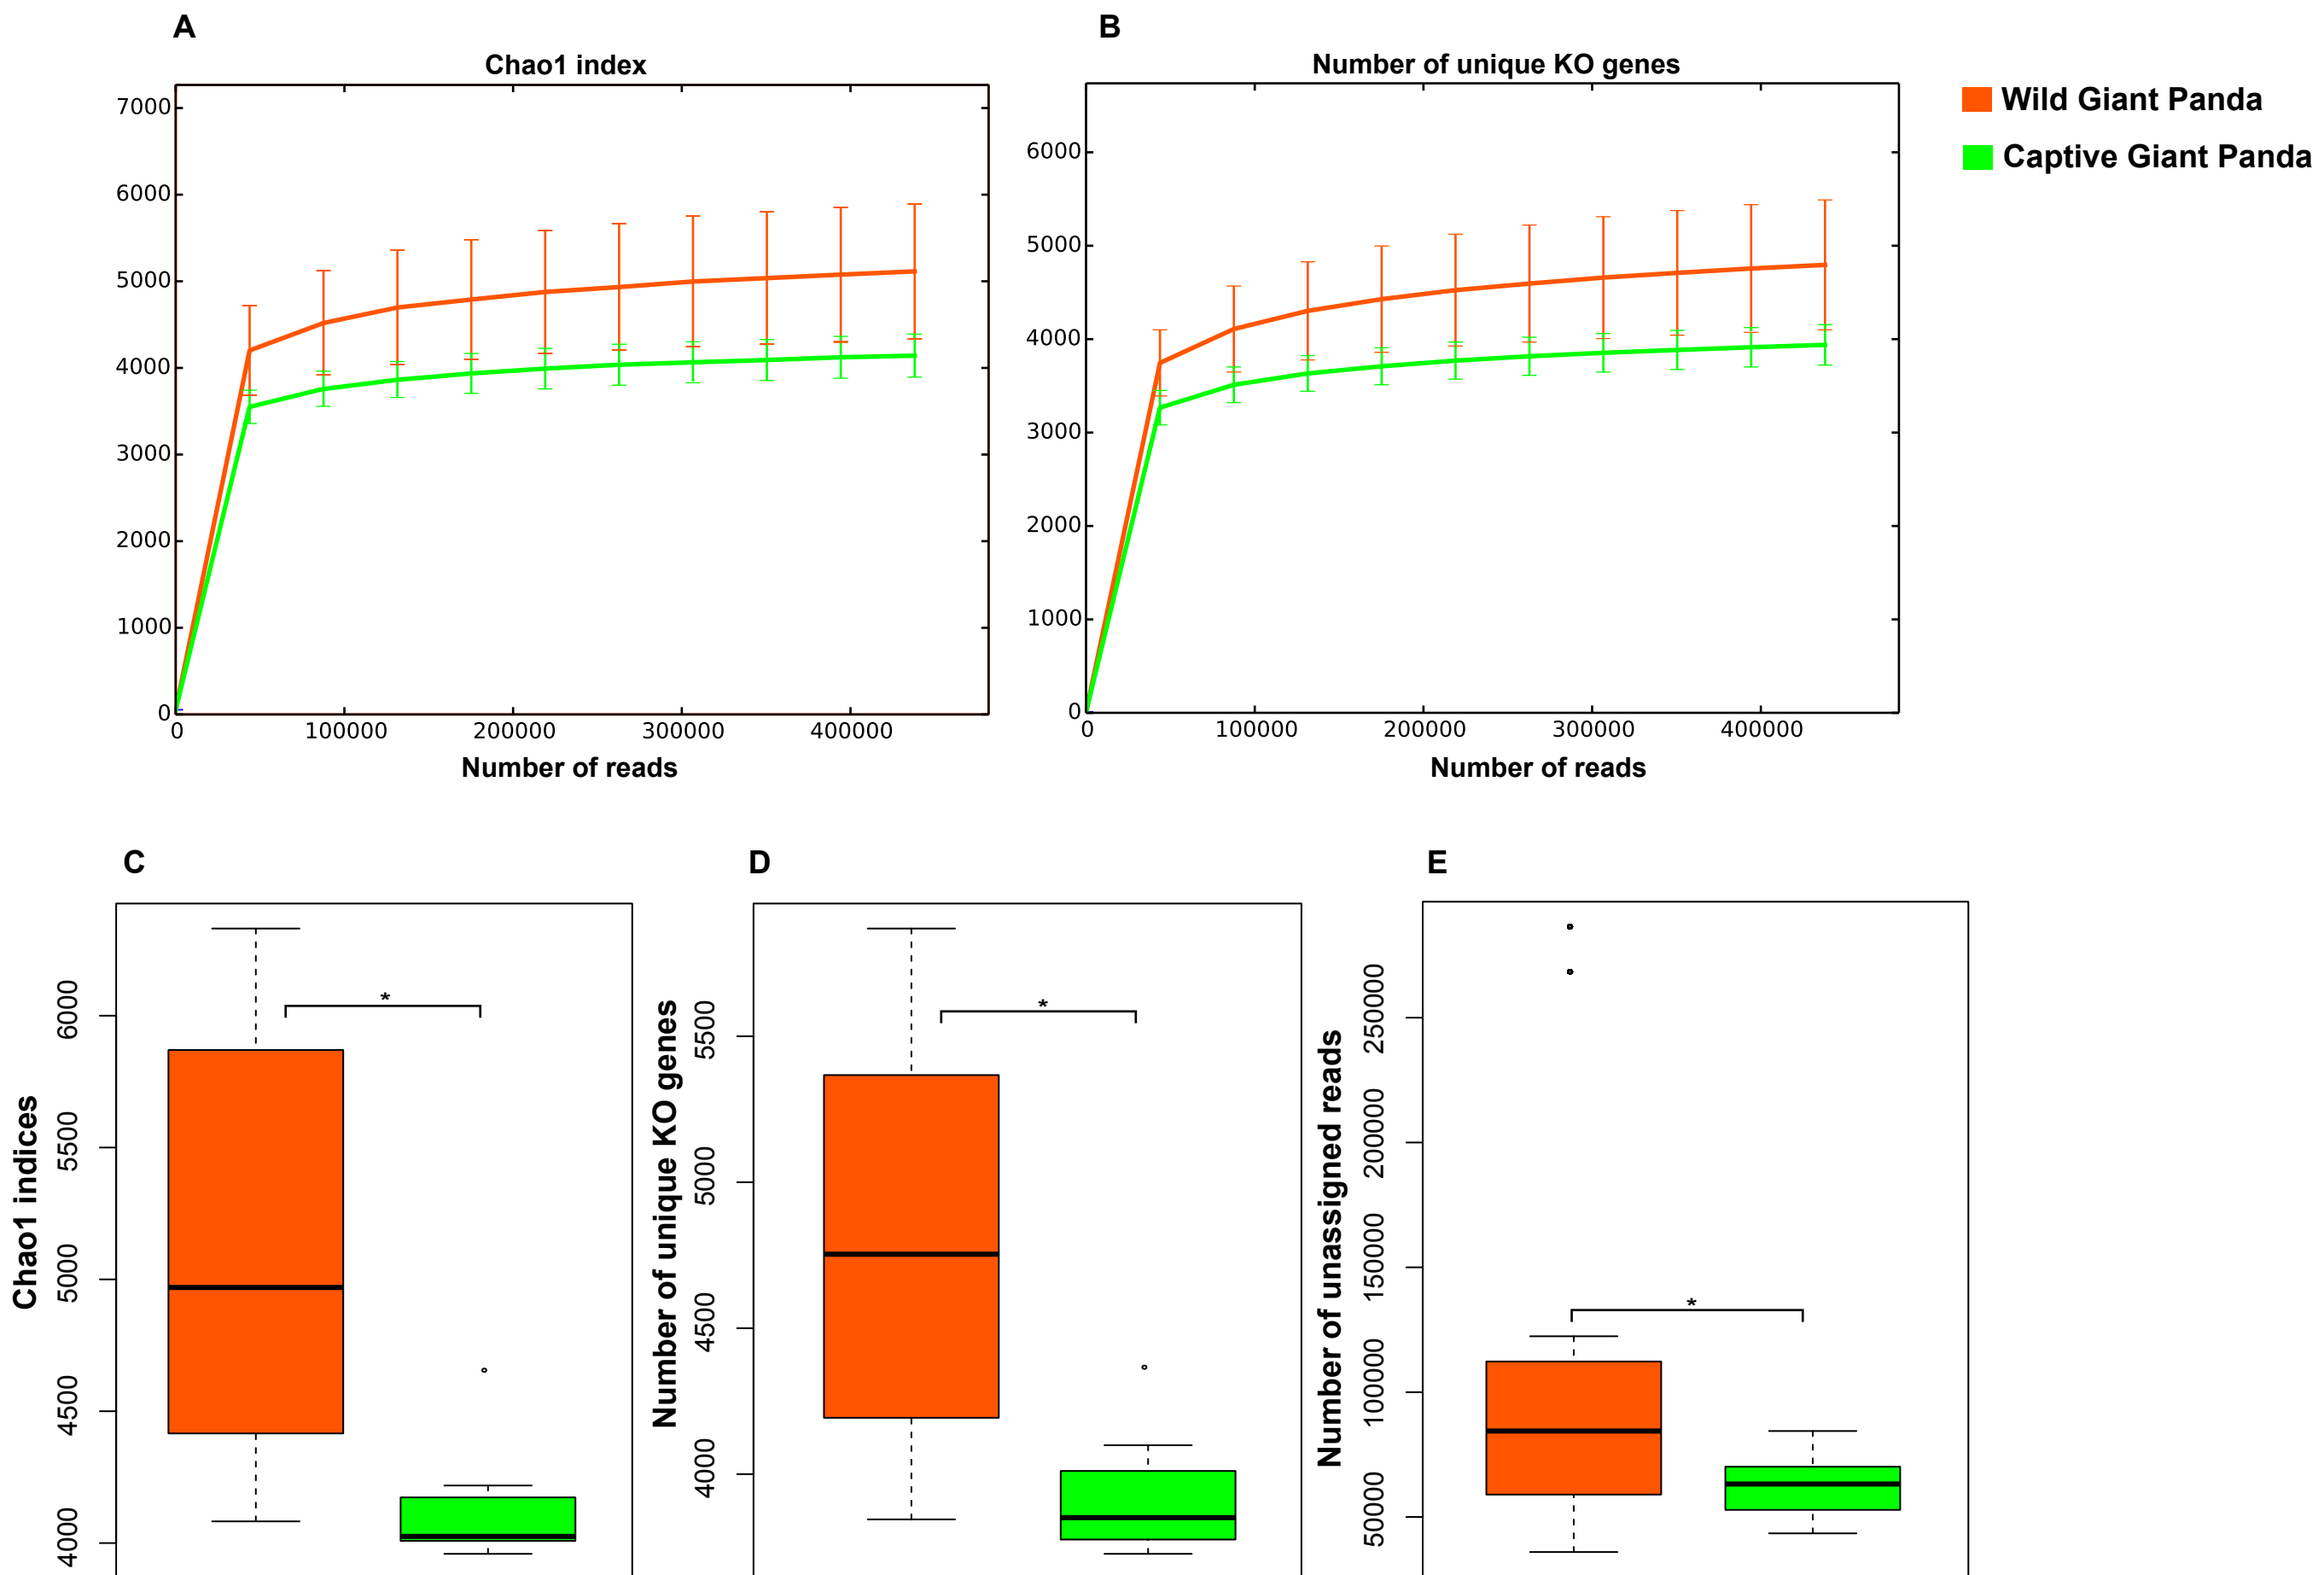

Supplement: s1 [file s1]

A

Jaccard

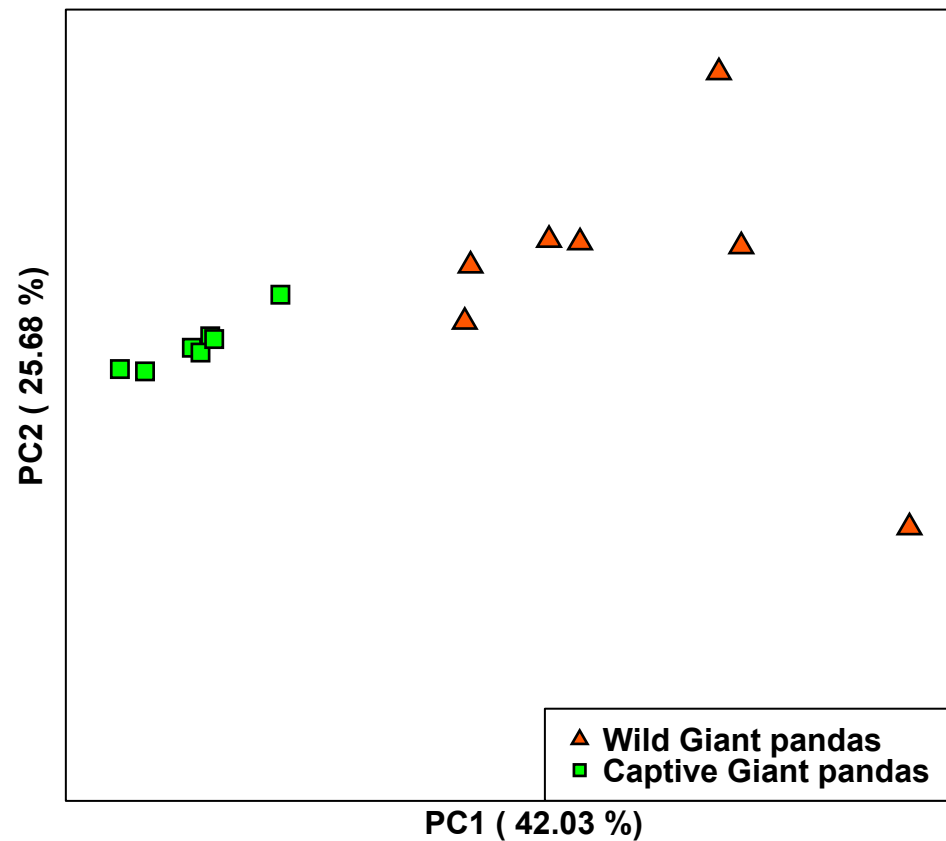

B

Bray-Curtis

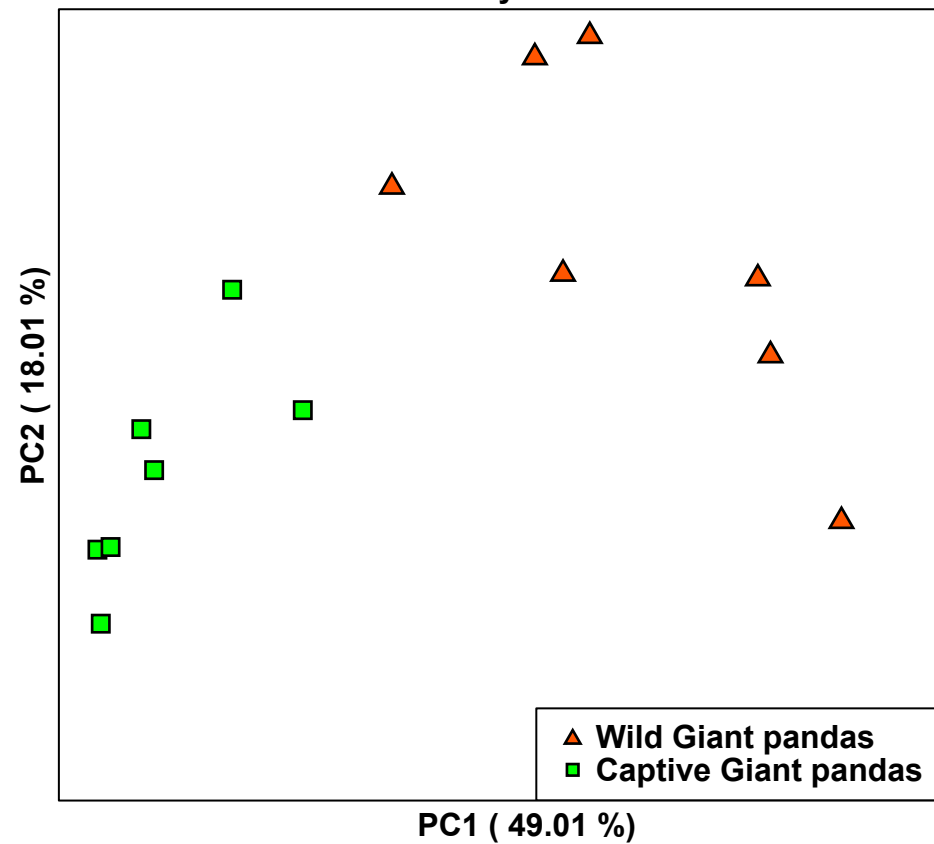

C

Endoglucanase (EC:3.2.1.4)

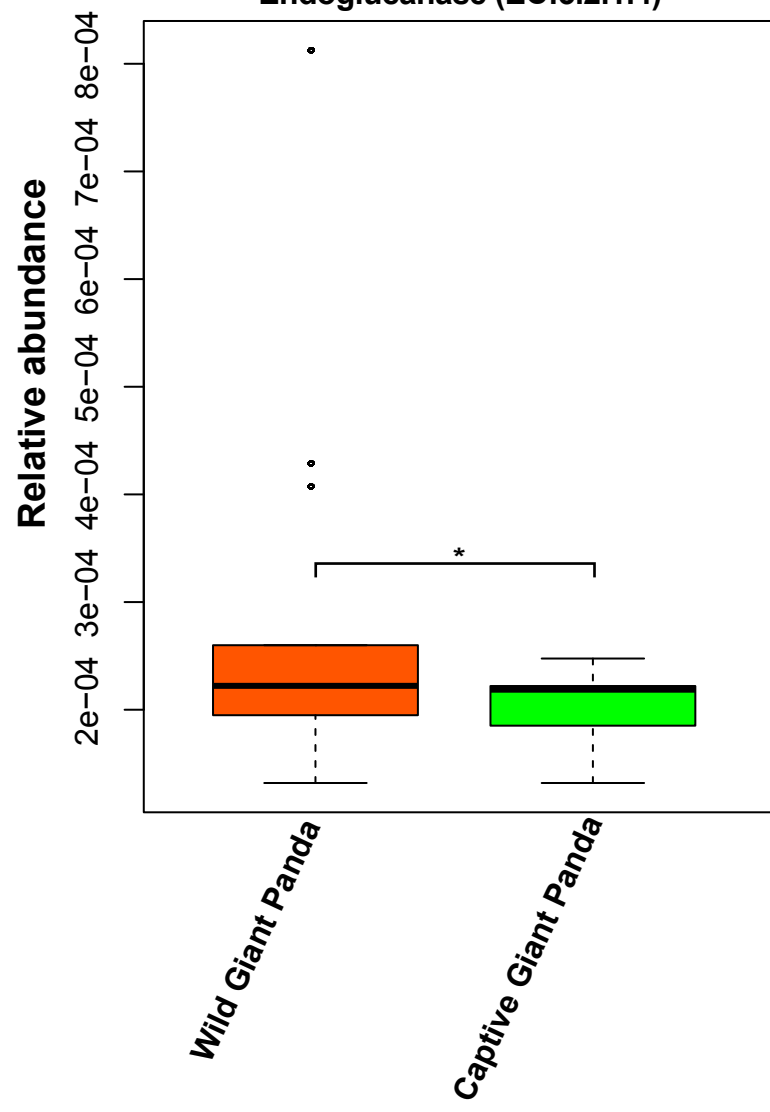

D

Alpha amylase (EC:3.2.1.1)

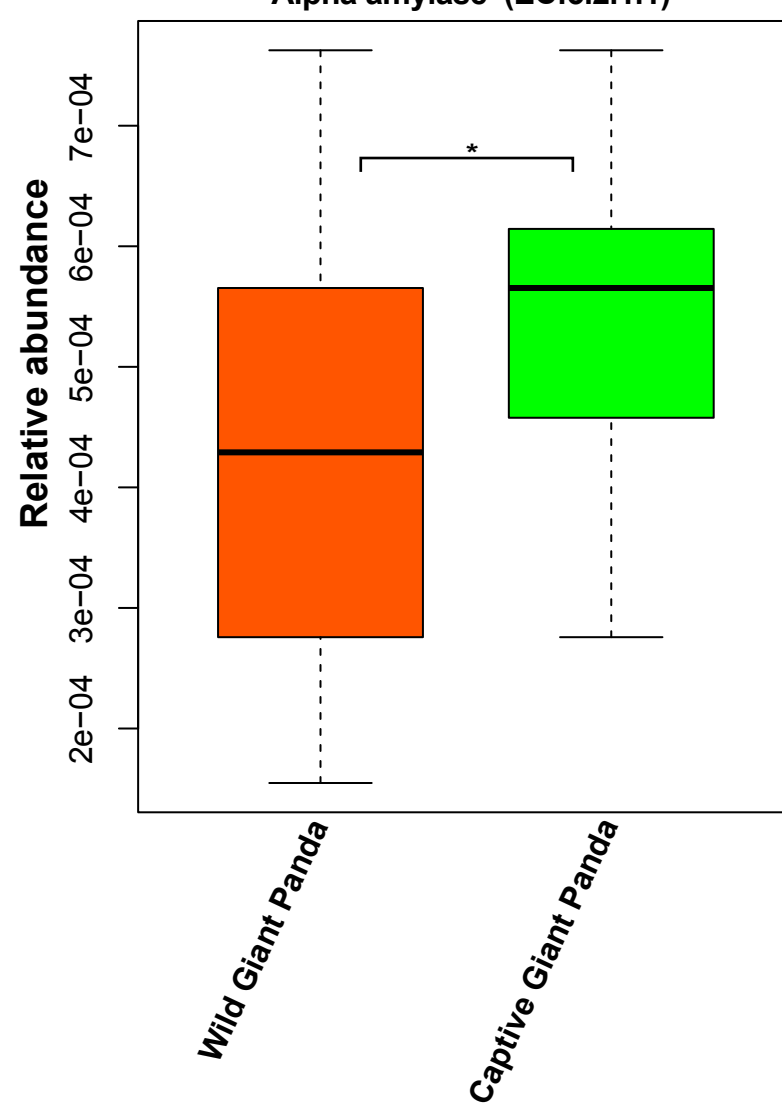

Supplement: s1 [file s1]

Figure S8

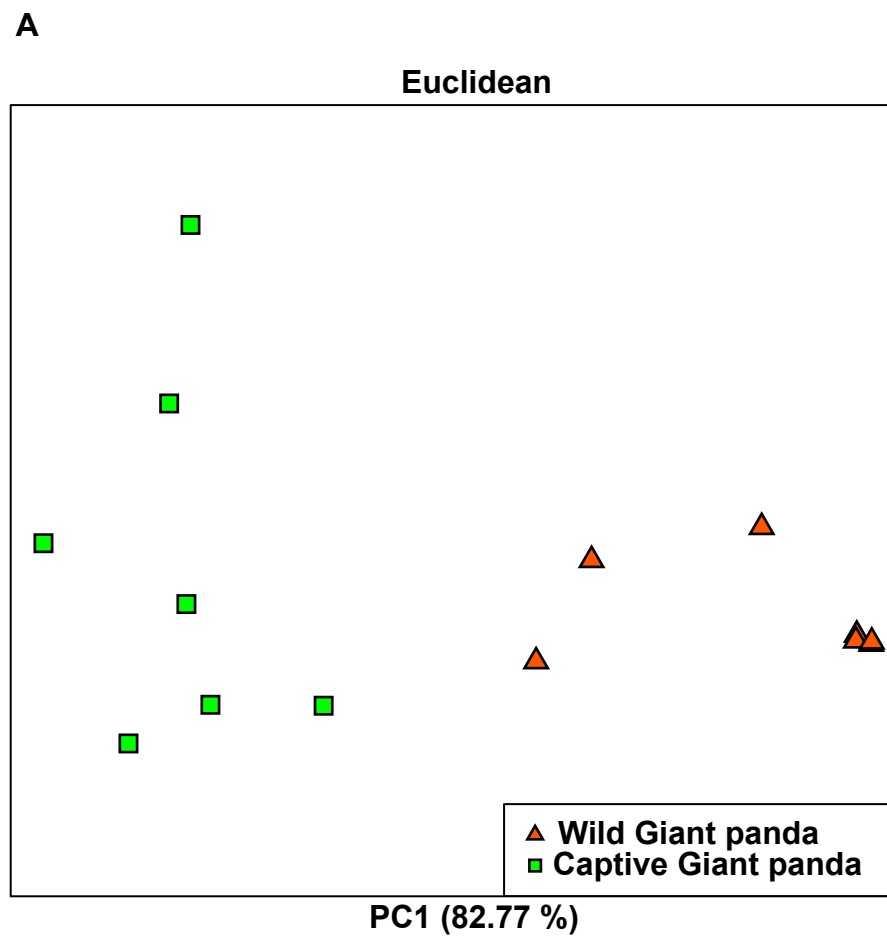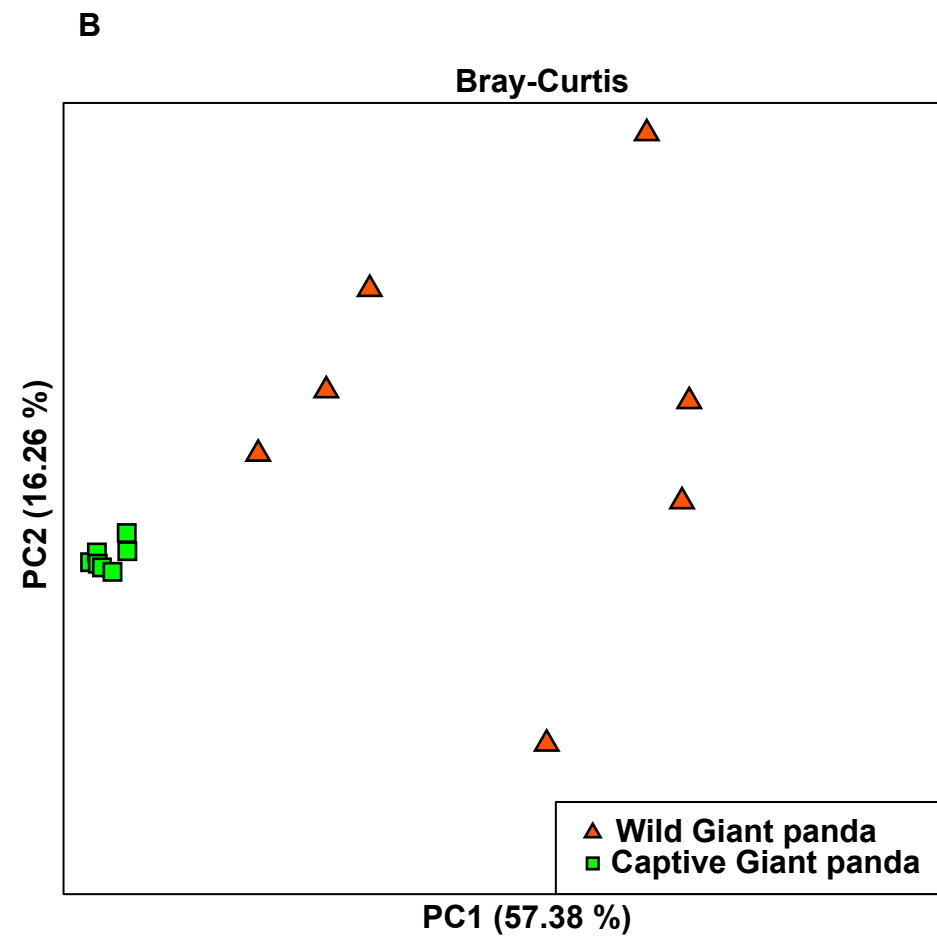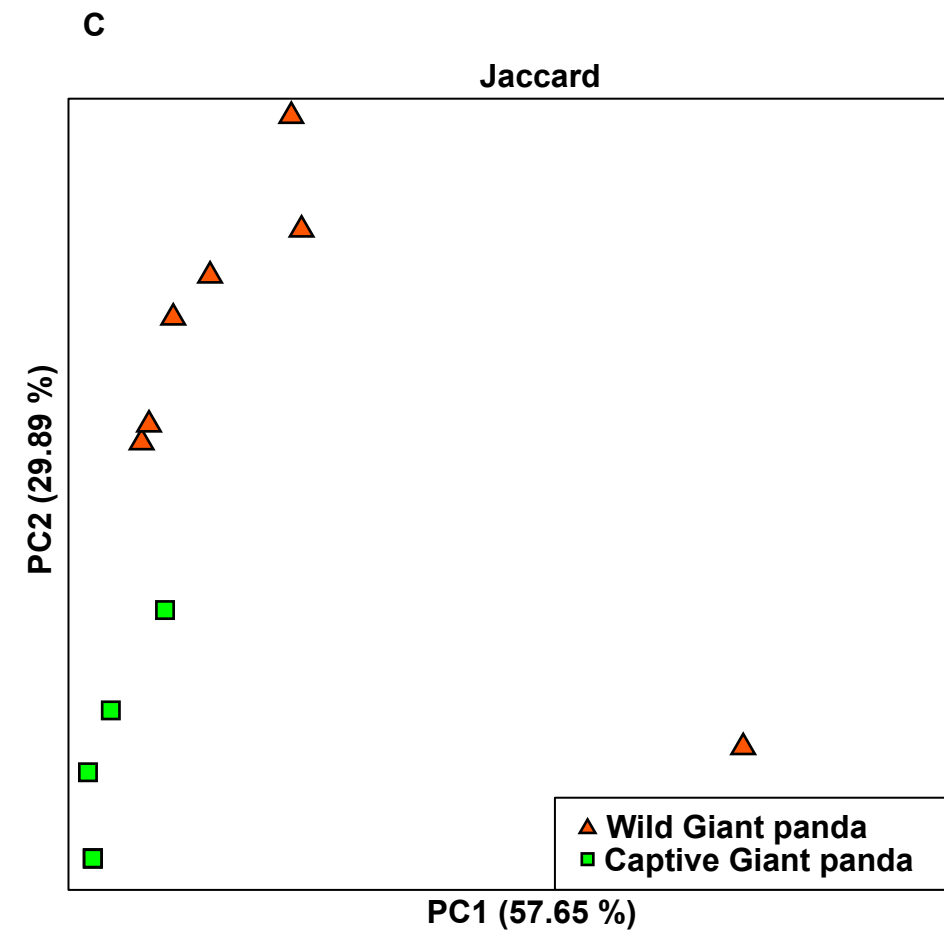

Supplement: s1 [file s1]

Figure S3

A

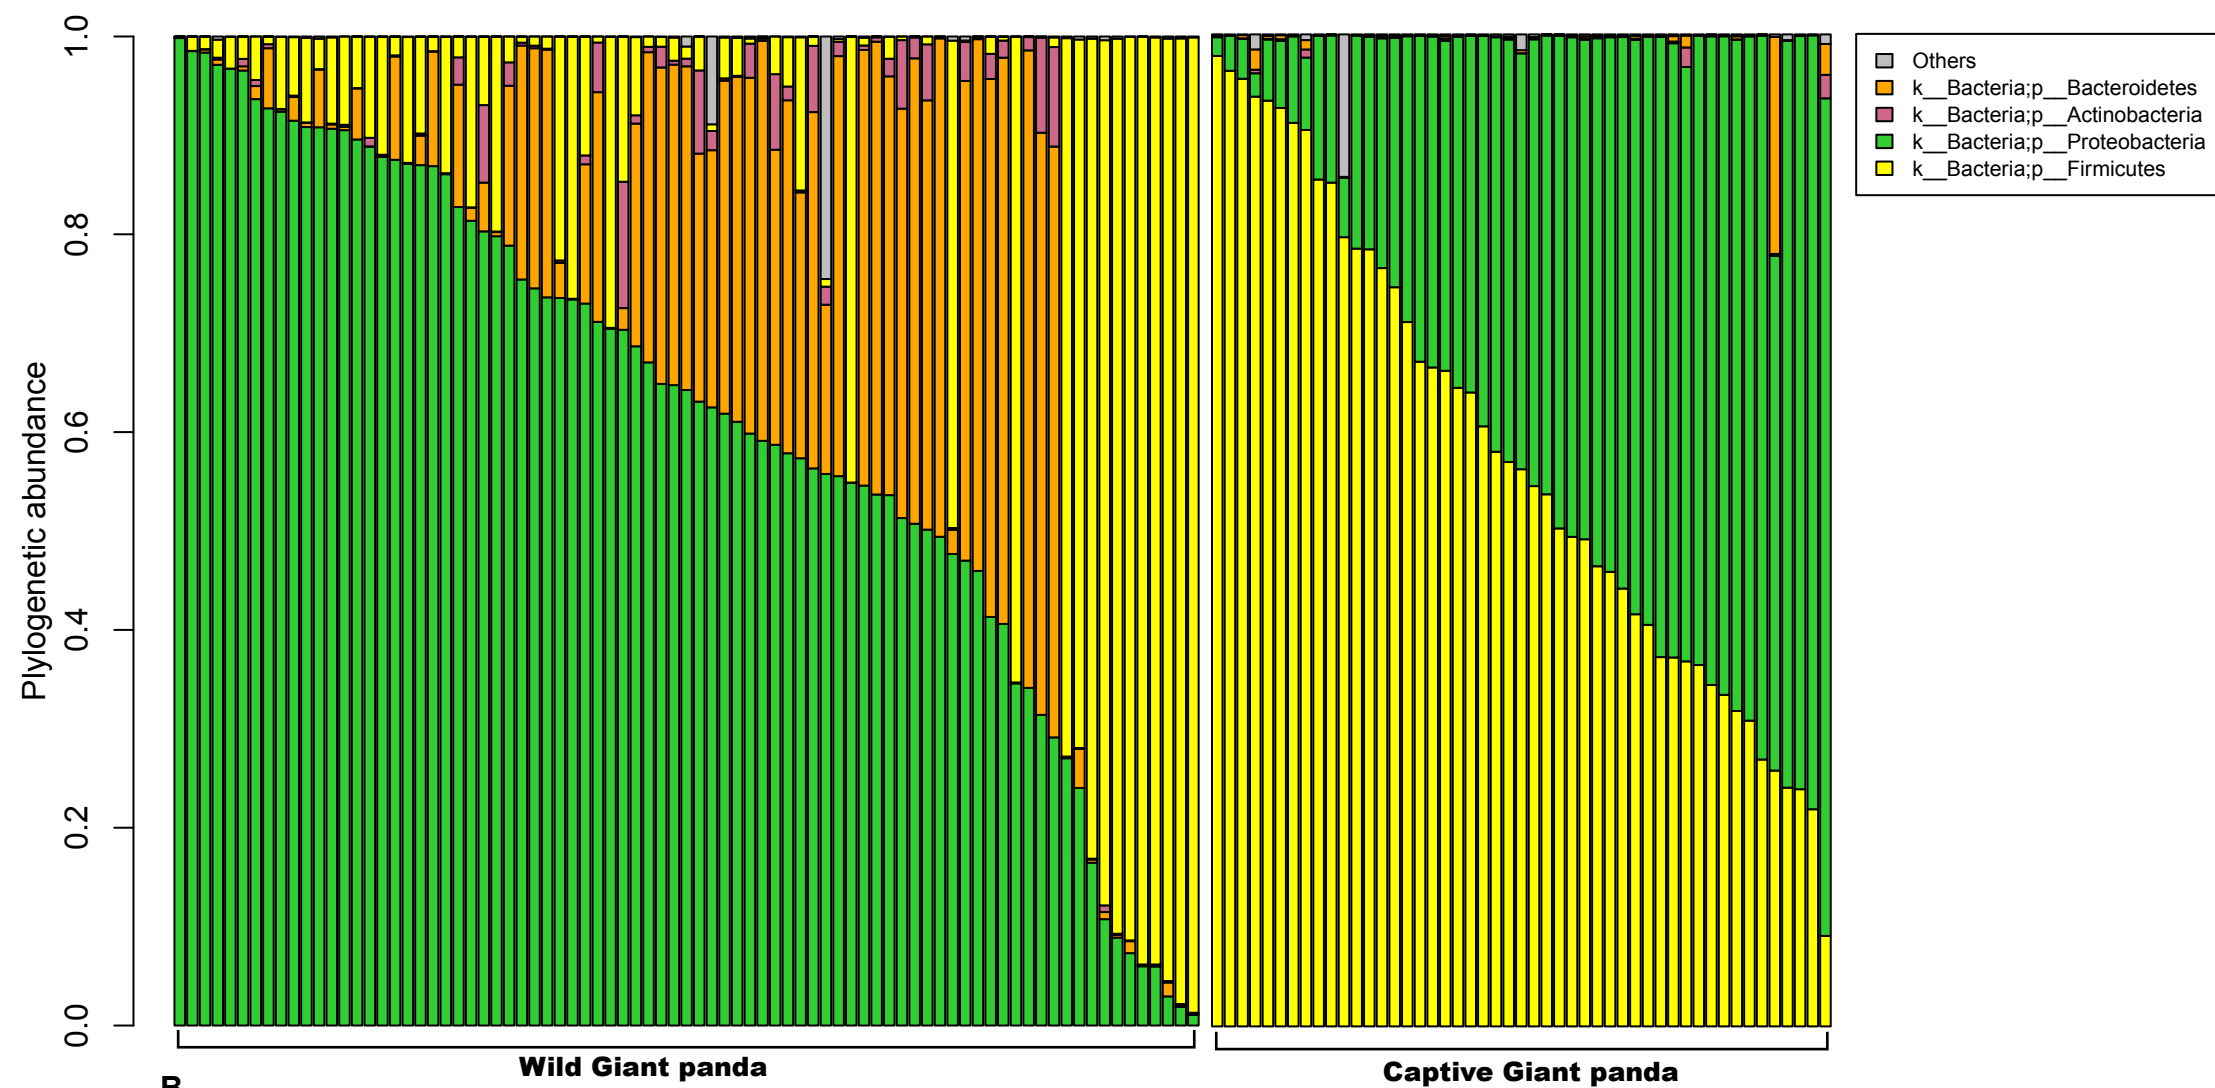

B

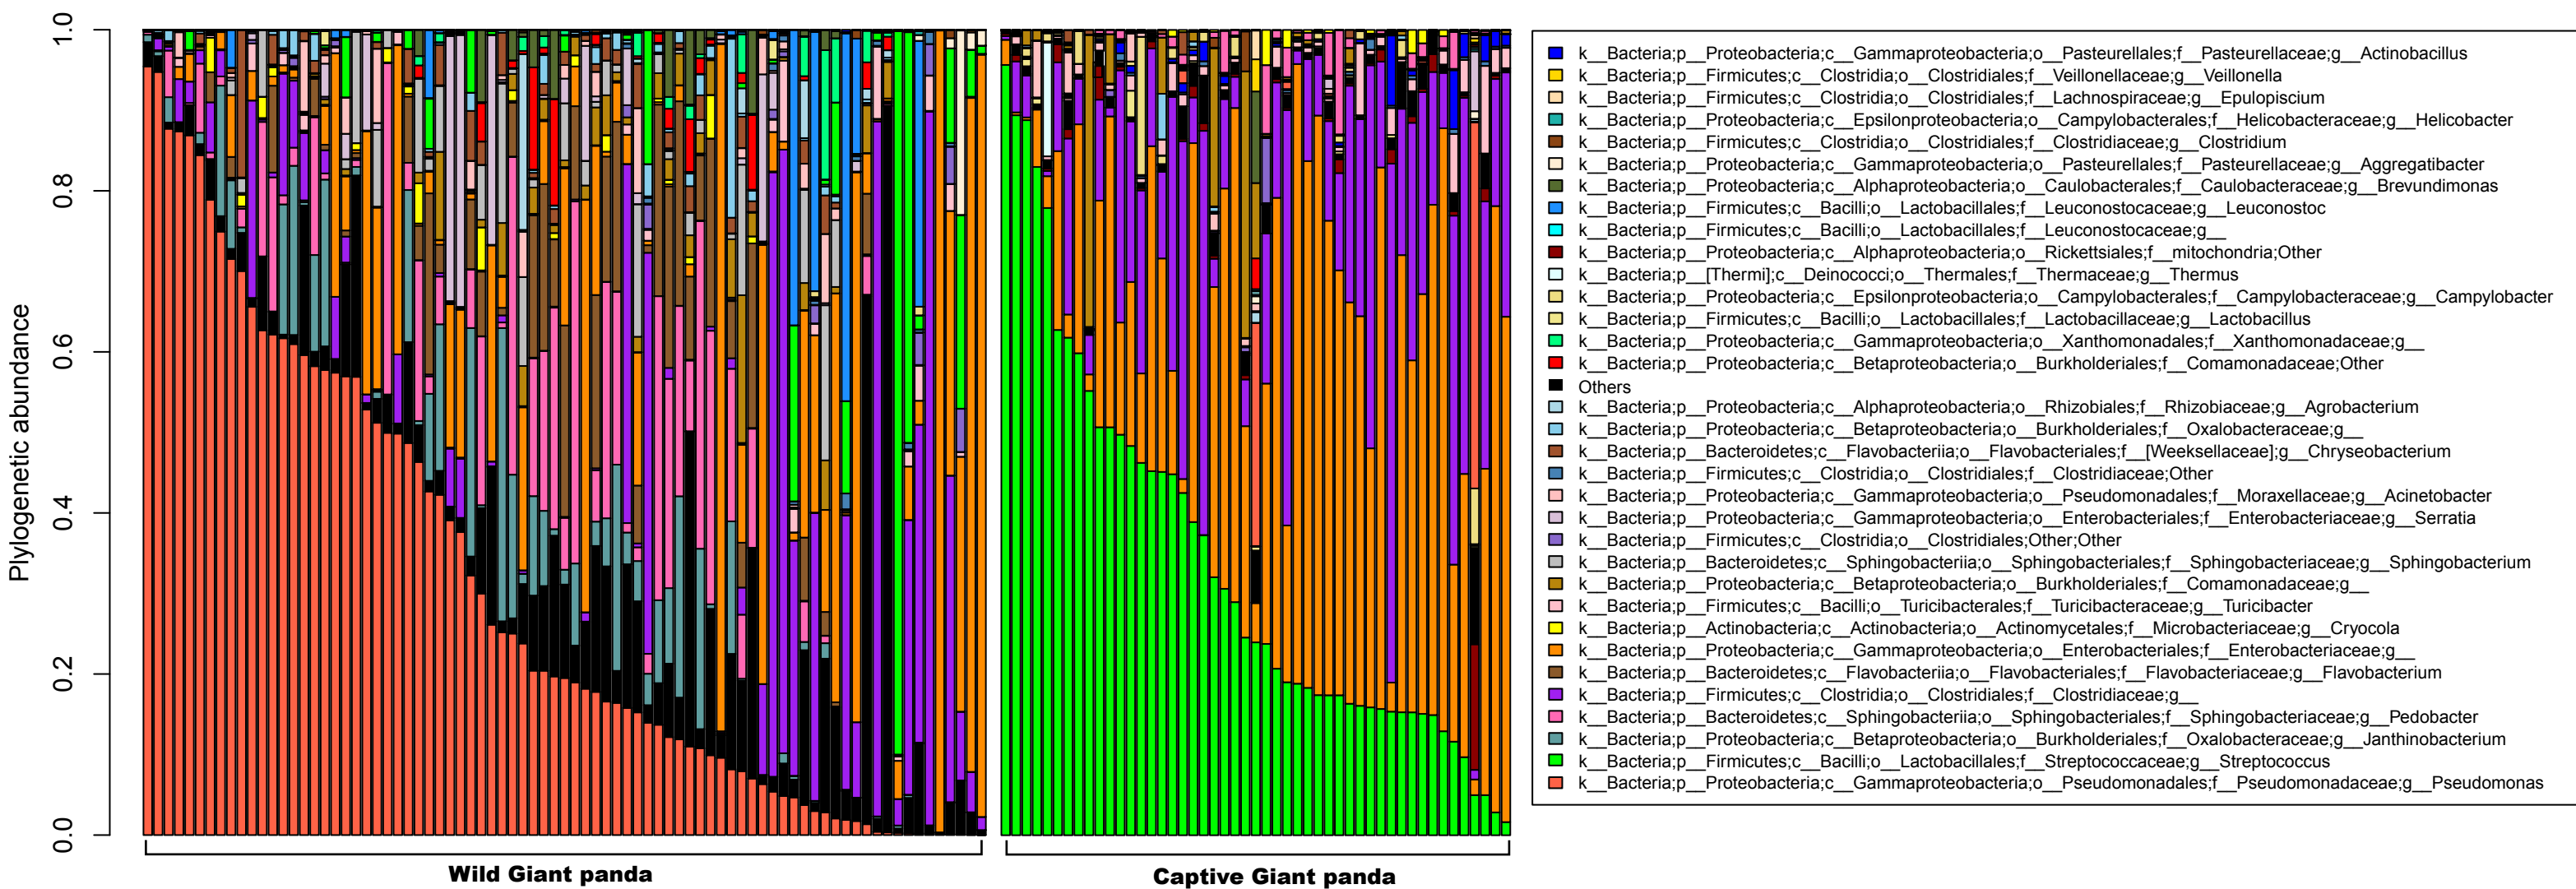

Supplement: s1 [file s1]

Figure S1

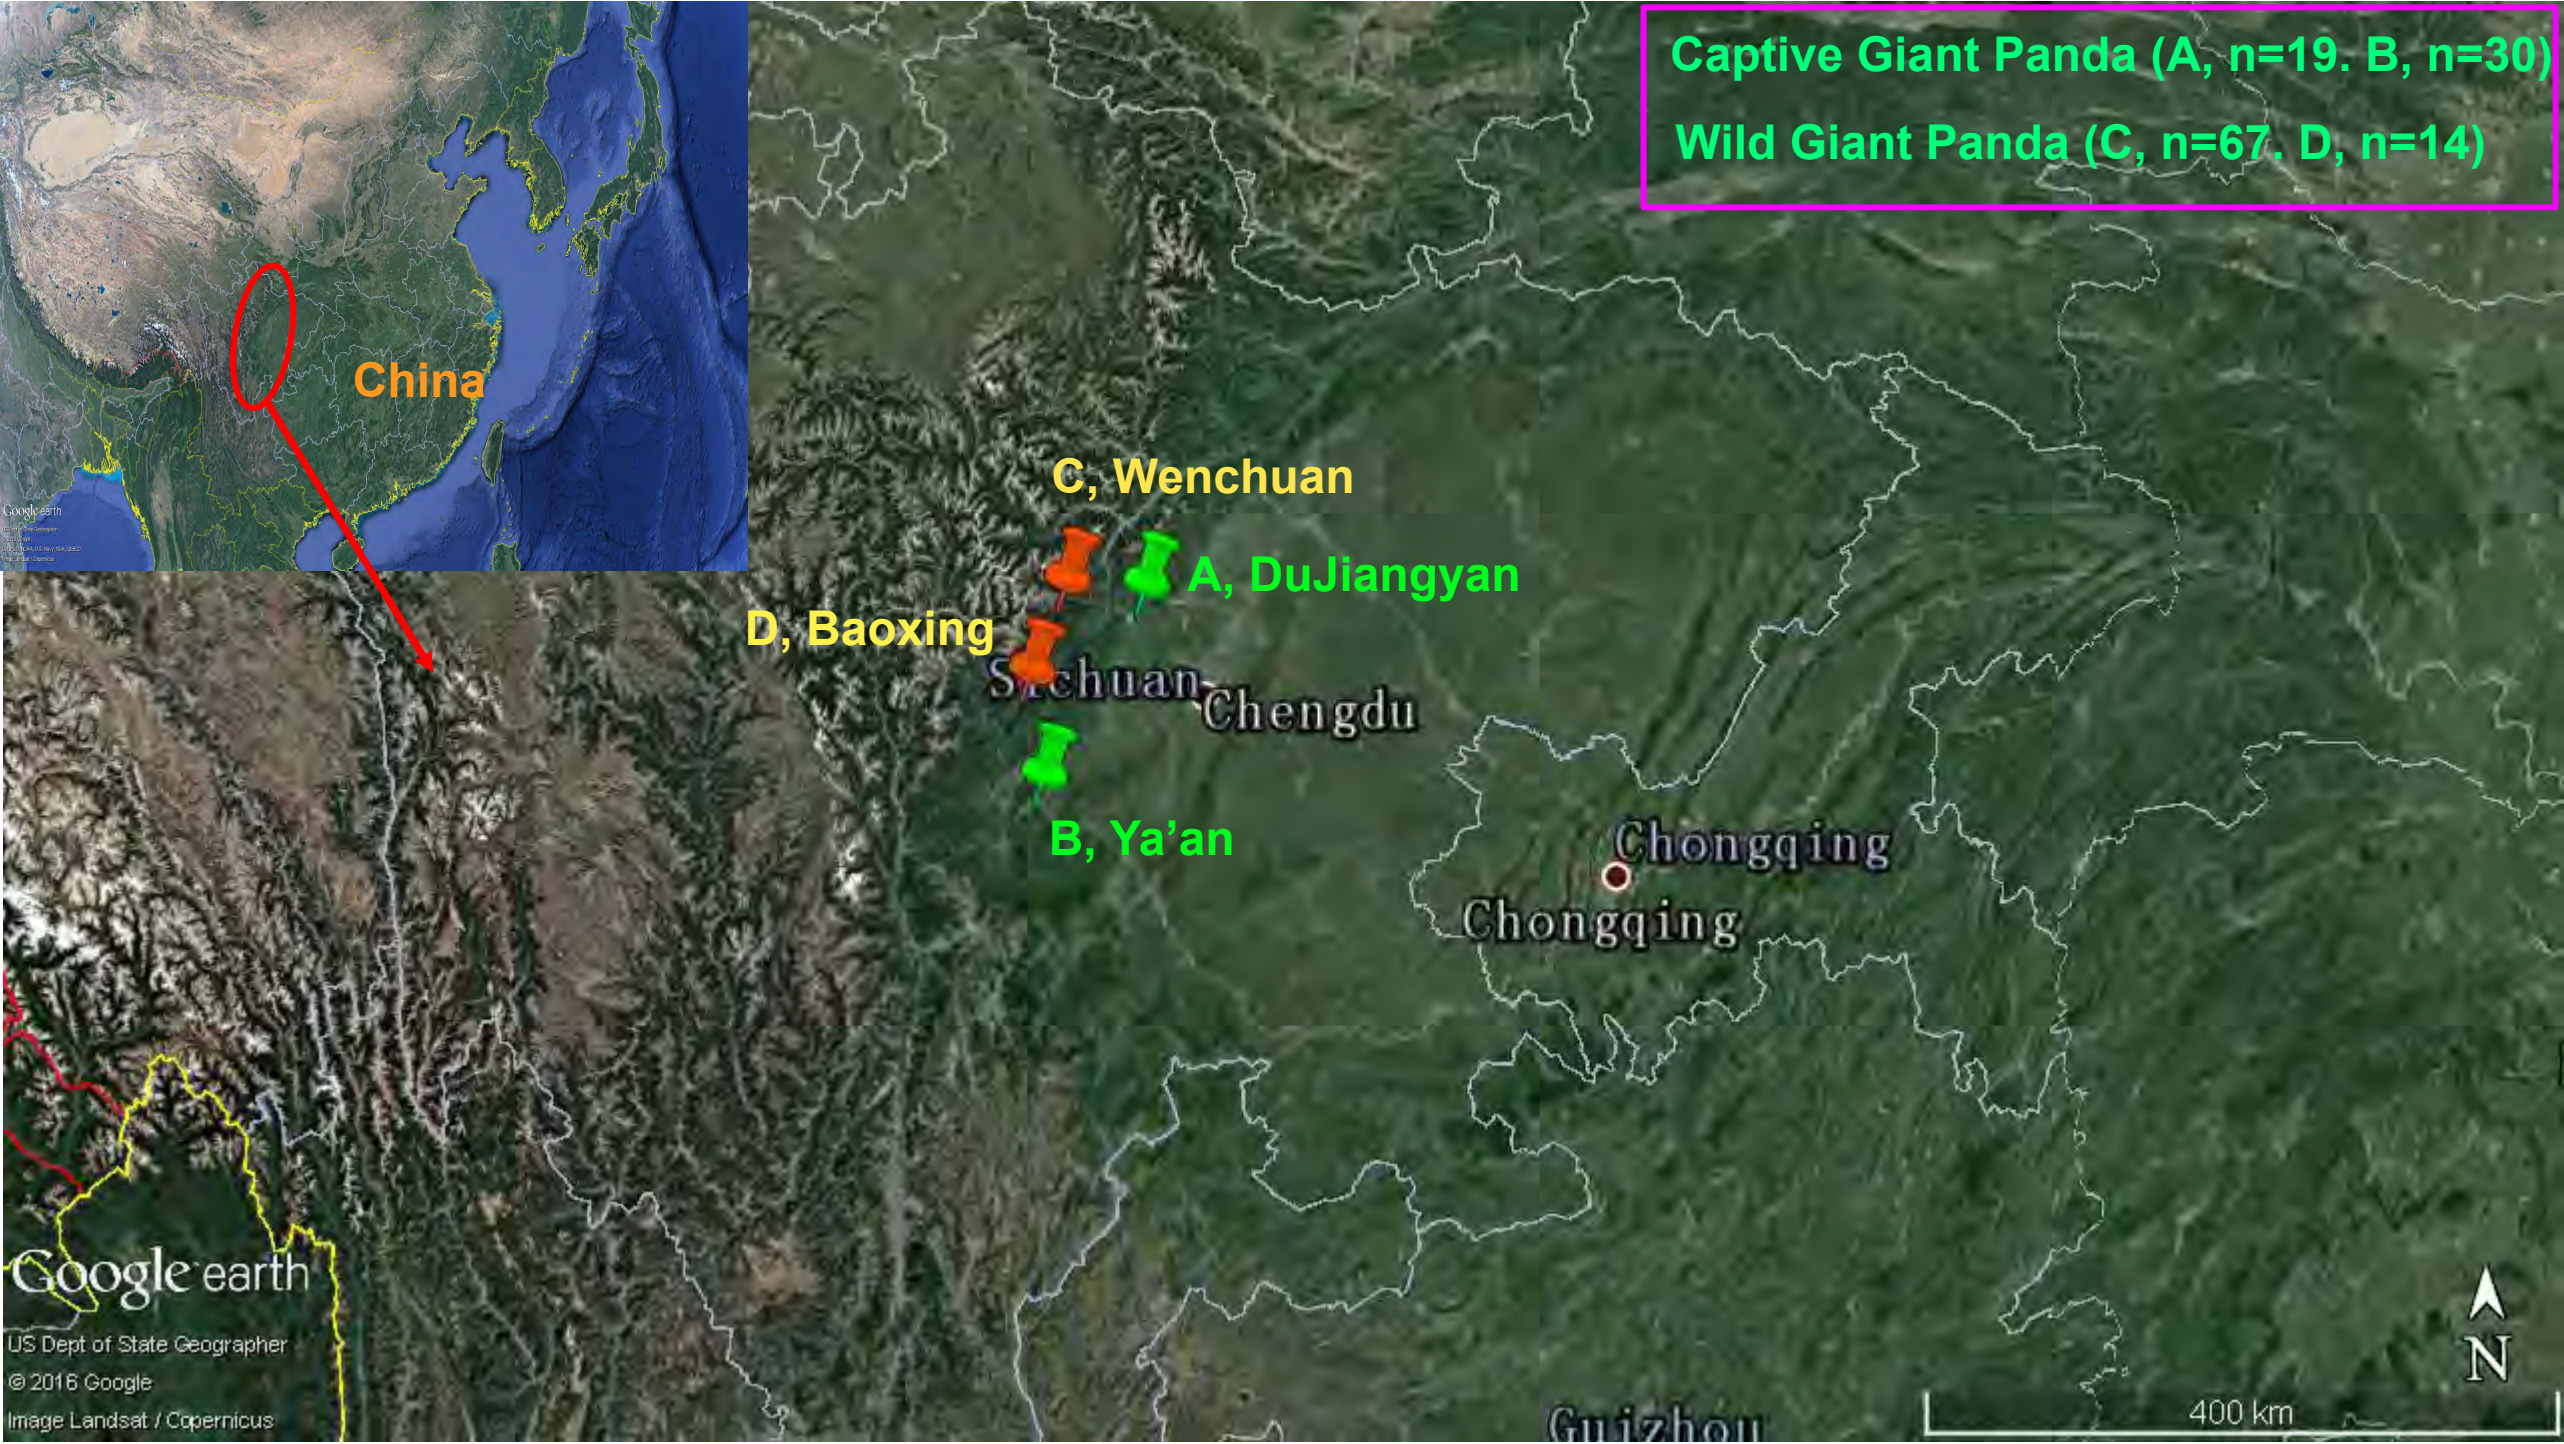

Supplement: s1 [file s1]

Figure S4

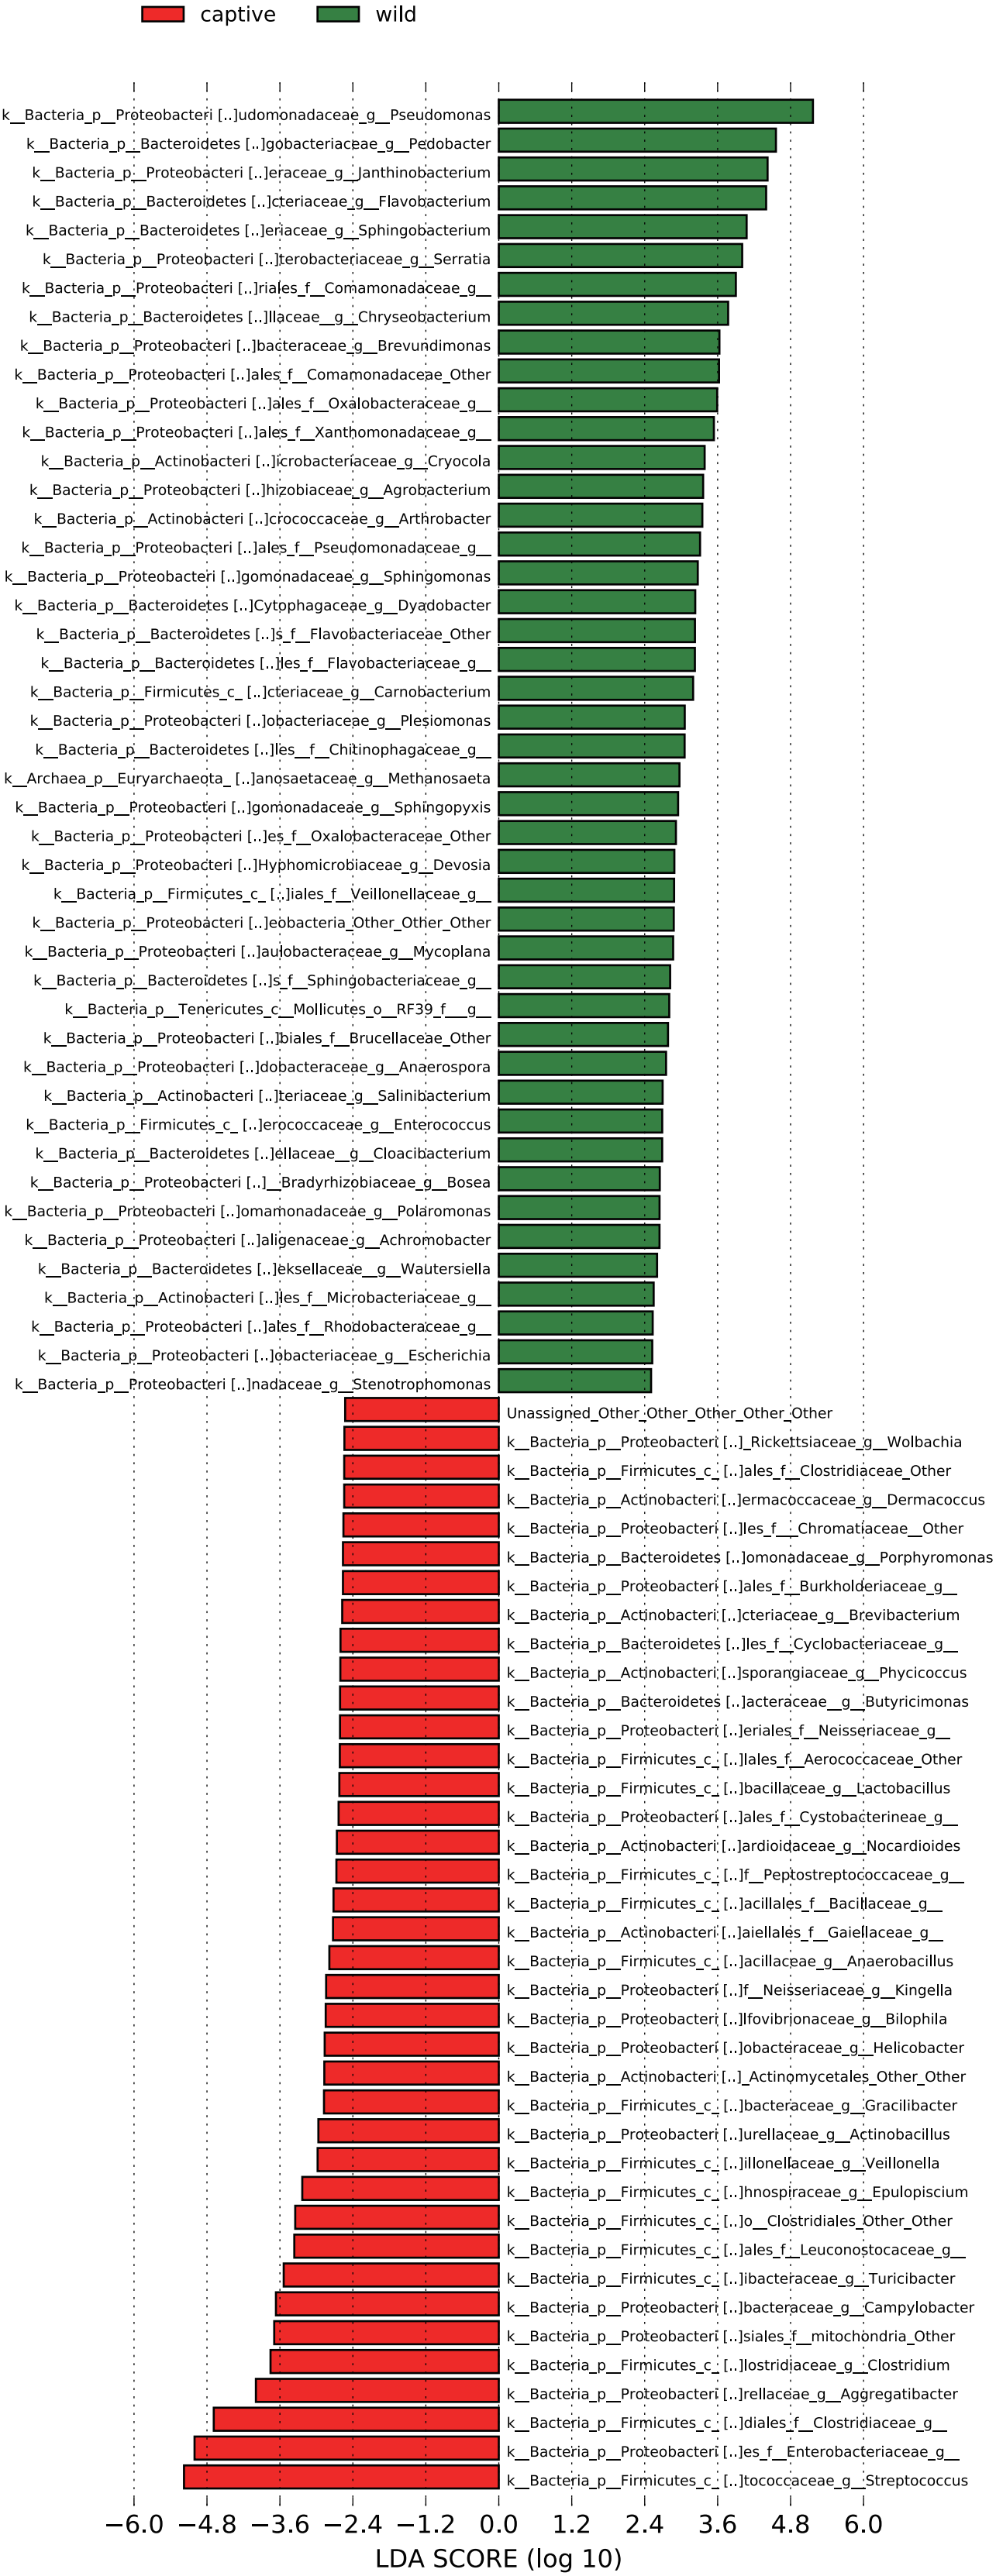

Supplement: s1 [file s1]

Figure S5

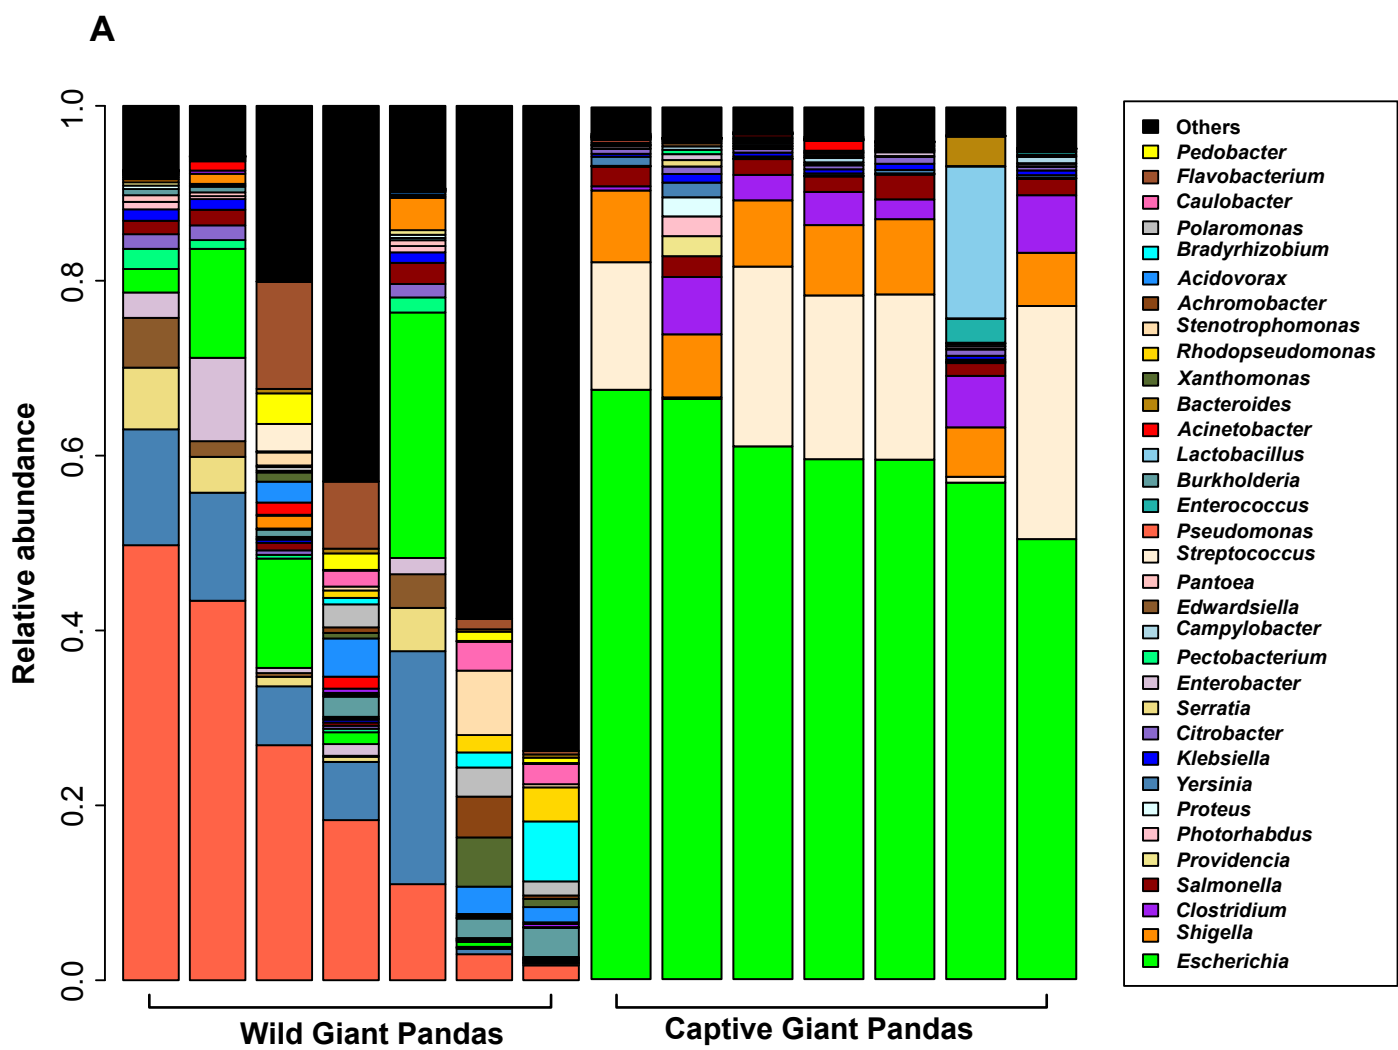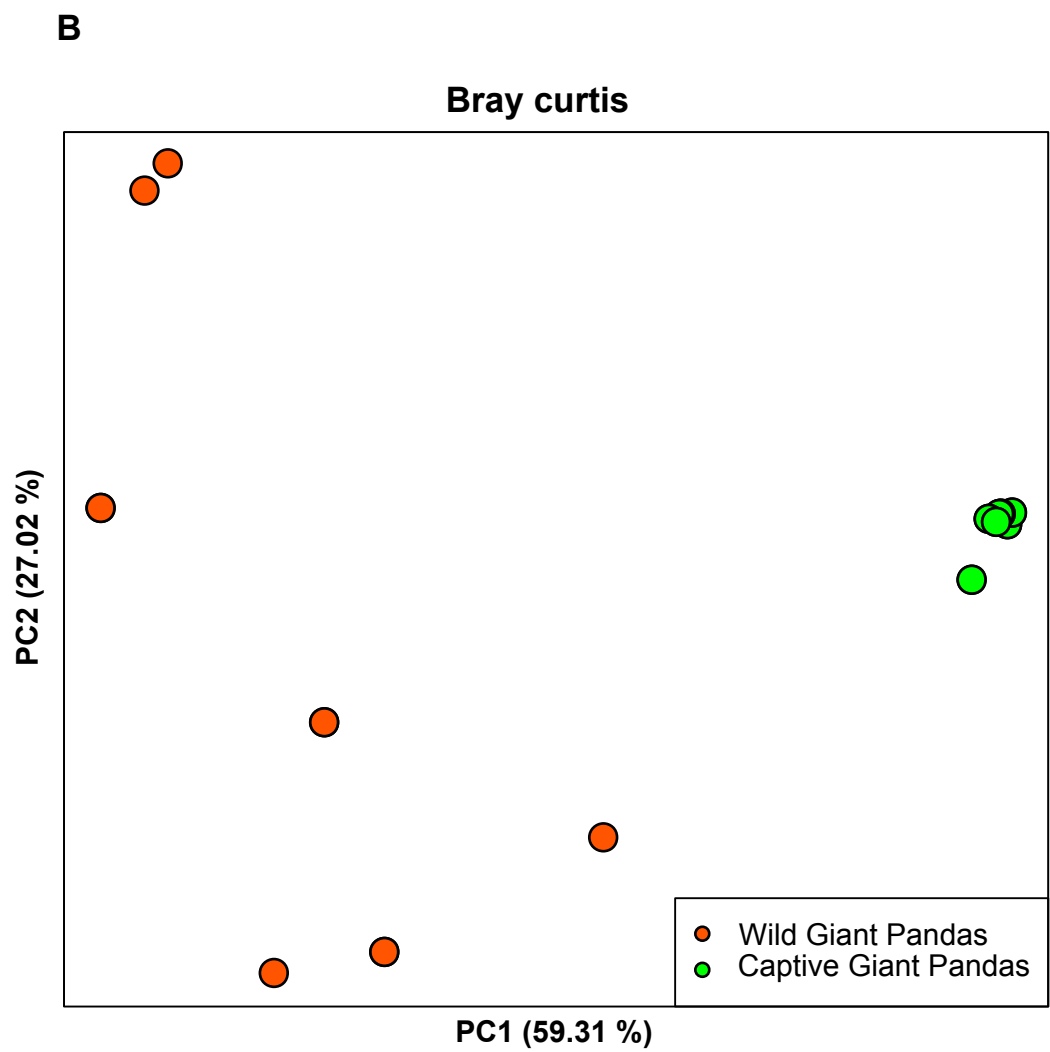

Supplement: s1 [file s1]
